# Supplementary material for: Clinical Progression and Cytokine Profiles of Middle East Respiratory Syndrome Coronavirus Infection
Source: PubMed Central journal article supplement — J Korean Med Sci. 2016 Sep 2;31(11):1717–25. doi: 10.3346/jkms.2016.31.11.1717 (PMC5056202; doi:10.3346/jkms.2016.31.11.1717), 2016-09-02
Supplement: jkms-31-1717-s001.pdf [file jkms-31-1717-s001.pdf]

**Supplementary Table 1.** The assay range of ELISA kit

| Brand             | Cat. No. | Description                                         | Assay range, pg/mL |
|-------------------|----------|-----------------------------------------------------|--------------------|
| PBL Assay Science | 41100-1  | Human IFN- $\alpha$ ELISA Kit, 1 plate              | 12.5-500           |
| PBL Assay Science | 41410-1  | Human IFN- $\beta$ ELISA Kit, 1 plate               | 50-4,000           |
| R&D system        | DY285    | Human IFN- $\gamma$ DuoSet ELISA, 15 Plates         | 15.6-1,000         |
| R&D system        | DY210    | Human TNF- $\alpha$ DuoSet ELISA, 15 Plates         | 15.6-1,000         |
| R&D system        | DY243    | Human TGF- $\beta$ 3 DuoSet ELISA, 15 Plates        | 31.3-2,000         |
| R&D system        | DY200    | Human IL-1 $\alpha$ /IL-1F1 DuoSet ELISA, 15 Plates | 7.81-500           |
| R&D system        | DY206    | Human IL-6 DuoSet ELISA, 15 Plates                  | 9.38-600           |
| R&D system        | DY217B   | Human IL-10 DuoSet ELISA, 15 Plates                 | 31.3-2,000         |
| R&D system        | DY1270   | Human IL-12 p70 DuoSet ELISA, 15 Plates             | 31.3-2,000         |
| R&D system        | DY317    | Human IL-17 DuoSet ELISA, 15 Plates                 | 15.6-1,000         |
| R&D system        | DY1240   | Human IL-12/IL-23 p40 DuoSet ELISA, 15 Plates       | 62.5-4,000         |
| R&D system        | DY266    | Human CXCL10/IP-10 DuoSet ELISA, 15 Plates          | 31.3-2,000         |
