# Supplementary material for: Clinical Progression and Cytokine Profiles of Middle East Respiratory Syndrome Coronavirus Infection
Source: PubMed Central journal article supplement — J Korean Med Sci. 2016 Sep 2;31(11):1717–25. doi: 10.3346/jkms.2016.31.11.1717 (PMC5056202; doi:10.3346/jkms.2016.31.11.1717), 2016-09-02
Supplement: jkms-31-1717-s002.pdf [file jkms-31-1717-s002.pdf]

**Supplementary Table 2.** Serial clinical and laboratory results during four weeks from the onset of illness

| Variable                                             | Day 1           | Day 3            | Day 7            | Day 10          | Day 14          | Day 17           | Day 21           | Day 28           |
|------------------------------------------------------|-----------------|------------------|------------------|-----------------|-----------------|------------------|------------------|------------------|
| <b>Patients, No.</b>                                 | 6               | 10               | 15               | 16              | 16              | 14               | 10               | 7                |
| <b>Clinical manifestations</b>                       |                 |                  |                  |                 |                 |                  |                  |                  |
| Fever*                                               | 38.3 (36.9-39)  | 38.2 (36.8-39.2) | 38.2 (36.3-39.9) | 38 (36.5-40.5)  | 37.5 (35.7-39)  | 37.2 (36.5-38.7) | 37.0 (36.4-38.3) | 37.2 (36.8-37.5) |
| Cough, No. (%) <sup>†</sup>                          | 3 (50)          | 5 (50)           | 9 (64)           | 9 (60)          | 7 (53)          | 7 (53)           | 2 (25)           | 2 (33)           |
| Dyspnea, No. (%) <sup>†</sup>                        | 0 (0)           | 0 (0)            | 4 (30)           | 9 (56)          | 9 (56)          | 6 (42)           | 4 (40)           | 3 (42)           |
| Diarrhea, No. (%) <sup>†</sup>                       | 1 (16)          | 2 (20)           | 2 (14)           | 4 (25)          | 5 (31)          | 4 (28)           | 2 (20)           | 1 (14)           |
| <b>Laboratory findings*</b>                          |                 |                  |                  |                 |                 |                  |                  |                  |
| Leukocyte count, × 10 <sup>3</sup> /mm <sup>3</sup>  | 5.6 (2.0-8.2)   | 4.7 (1.6-8.1)    | 4.5 (2.3-7.2)    | 4.6 (2.9-11.4)  | 5.7 (2.0-20.7)  | 6.3 (3.7-15.4)   | 7.3 (4.0-15.9)   | 6.2 (3.7-11.0)   |
| ANC, × 10 <sup>3</sup> /mm <sup>3</sup>              | 4.0 (1.3-5.3)   | 2.8 (0.9-4.9)    | 2.4 (0.7-5.0)    | 2.8 (0.9-7.8)   | 4.7 (1.5-7.1)   | 4.2 (2.3-19.2)   | 4.3 (1.6-11.5)   | 4.0 (1.3-18.1)   |
| Lymphocyte count, × 10 <sup>3</sup> /mm <sup>3</sup> | 1.3 (0.5-3.1)   | 0.8 (0.4-1.7)    | 1.0 (0.6-2.6)    | 0.7 (0.3-3.0)   | 0.7 (0.03-2.3)  | 0.8 (0.2-1.8)    | 1.4 (0.5-2.2)    | 1.1 (0.2-2.5)    |
| Hemoglobin, g/dL                                     | 11.6 (9.8-18.5) | 12.6 (9.4-16.6)  | 12.8 (9.2-16.1)  | 13.0 (8.7-16.1) | 10.9 (7.7-14.8) | 10.6 (6.3-14.5)  | 11.0 (8.0-15.0)  | 10.6 (5.4-13.1)  |
| Platelet count, × 10 <sup>3</sup> /mm <sup>3</sup>   | 225 (151-600)   | 176 (65-600)     | 141 (77-359)     | 179 (63-376)    | 212 (38-540)    | 271 (84-611)     | 403 (115-514)    | 383 (130-456)    |
| Protein, g/dL                                        | 6.7 (6.5-8.1)   | 6.0 (5.7-7.3)    | 6.0 (4.5-7.4)    | 5.8 (3.8-7.1)   | 5.8 (3.7-7.3)   | 6.2 (3.9-8.8)    | 6.2 (5.0-6.9)    | 6.2 (5.0-7.4)    |
| Albumin, g/dL                                        | 3.2 (2.9-4.7)   | 3.4 (2.6-3.9)    | 3.3 (2.5-4.6)    | 3.3 (2.1-4.3)   | 3.1 (1.9-4.5)   | 3.1 (2.1-3.7)    | 3.2 (2.3-3.7)    | 3.2 (2.4-3.7)    |
| AST, IU/L                                            | 33 (25-52)      | 38 (23-50)       | 46 (16-204)      | 76 (20-328)     | 51 (23-215)     | 64 (23-290)      | 50 (24-89)       | 29 (15-17)       |
| ALT, IU/L                                            | 29 (5-74)       | 33 (10-75)       | 36 (10-125)      | 44 (10-292)     | 48 (14-184)     | 53 (24-357)      | 88 (21-201)      | 45 (14-84)       |
| LDH, IU/L                                            | 222 (188-736)   | 274 (188-736)    | 408 (182-1,074)  | 684 (378-1,001) | 466 (171-765)   | 649 (540-715)    | 460 (454-584)    | 537 (275-968)    |
| CPK, IU/L                                            | 29 (18-77)      | 74 (18-270)      | 52 (16-890)      | 581 (32-1,368)  | 32 (19-712)     | 293 (202-589)    | 164 (140-294)    | 92 (76-160)      |
| C-reactive protein, mg/dL                            | 2.1 (0.3-10.5)  | 1.2 (0.2-13.4)   | 3.8 (0.1-26.7)   | 13.0 (0.1-27.3) | 7.9 (0.1-33.0)  | 4.9 (1.6-9.5)    | 1.6 (0.6-4.5)    | 5.7 (0.1-16.0)   |
| Potassium, mM/L                                      | 4.3 (2.7-4.9)   | 4 (3.3-4.9)      | 4 (3.2-5)        | 4.1 (3.1-4.6)   | 4.3 (3.7-4.7)   | 4.3 (3.6-5.3)    | 4.4 (3.7-4.9)    | 4.4 (2.7-5.5)    |
| Serum creatinine, mg/dL                              | 0.9 (0.6-1.5)   | 1.0 (0.6-1.5)    | 0.8 (0.5-1.5)    | 0.8 (0.4-1.5)   | 0.7 (0.4-2.7)   | 0.7 (0.5-2.1)    | 0.6 (0.5-1.6)    | 0.7 (0.5-2.0)    |
| Prothrombin time, INR                                | 1.1 (1.1-1.2)   | 1.1 (0.9-1.3)    | 1.0 (0.9-1.4)    | 1.0 (0.9-1.2)   | 1.1 (1.0-1.4)   | 1.1 (0.9-1.3)    | 1.1 (1.0-1.2)    | 1.1 (0.9-1.2)    |
| aPTT, sec                                            | 31 (26-41)      | 33 (26-68)       | 35 (24-59)       | 33 (24-52)      | 30 (24-97)      | 30 (22-34)       | 28 (23-33)       | 32 (26-47)       |
| Urine blood, dipstick (0-4+)                         | ND              | 3 (0-3)          | 0.5 (0-3)        | 0 (0-3)         | 1.25 (0-3)      | 2 (0-3)          | 1 (0-3)          | 0.5 (0-3)        |
| Urine albumin, dipstick (0-4+)                       | 0.5 (0-2)       | 0.5 (0-2)        | 1 (0-2)          | 2 (0-3)         | 2 (0-3)         | 1 (0-2)          | 0.8 (0-1)        | 0.3 (0-2)        |

ANC = absolute neutrophil count, AST = aspartate aminotransferase, ALT = alanine aminotransferase, LDH = lactate dehydrogenase, CPK = creatinine phosphokinase, aPTT = activated partial thromboplastin time. \*Median (range), †There are inconsistencies of denominator, so the percentage may be different with the same number of patients.
