# Supplementary material for: Clinical Progression and Cytokine Profiles of Middle East Respiratory Syndrome Coronavirus Infection
Source: PubMed Central journal article supplement — J Korean Med Sci. 2016 Sep 2;31(11):1717–25. doi: 10.3346/jkms.2016.31.11.1717 (PMC5056202; doi:10.3346/jkms.2016.31.11.1717), 2016-09-02
Supplement: jkms-31-1717-s003.pdf [file jkms-31-1717-s003.pdf]

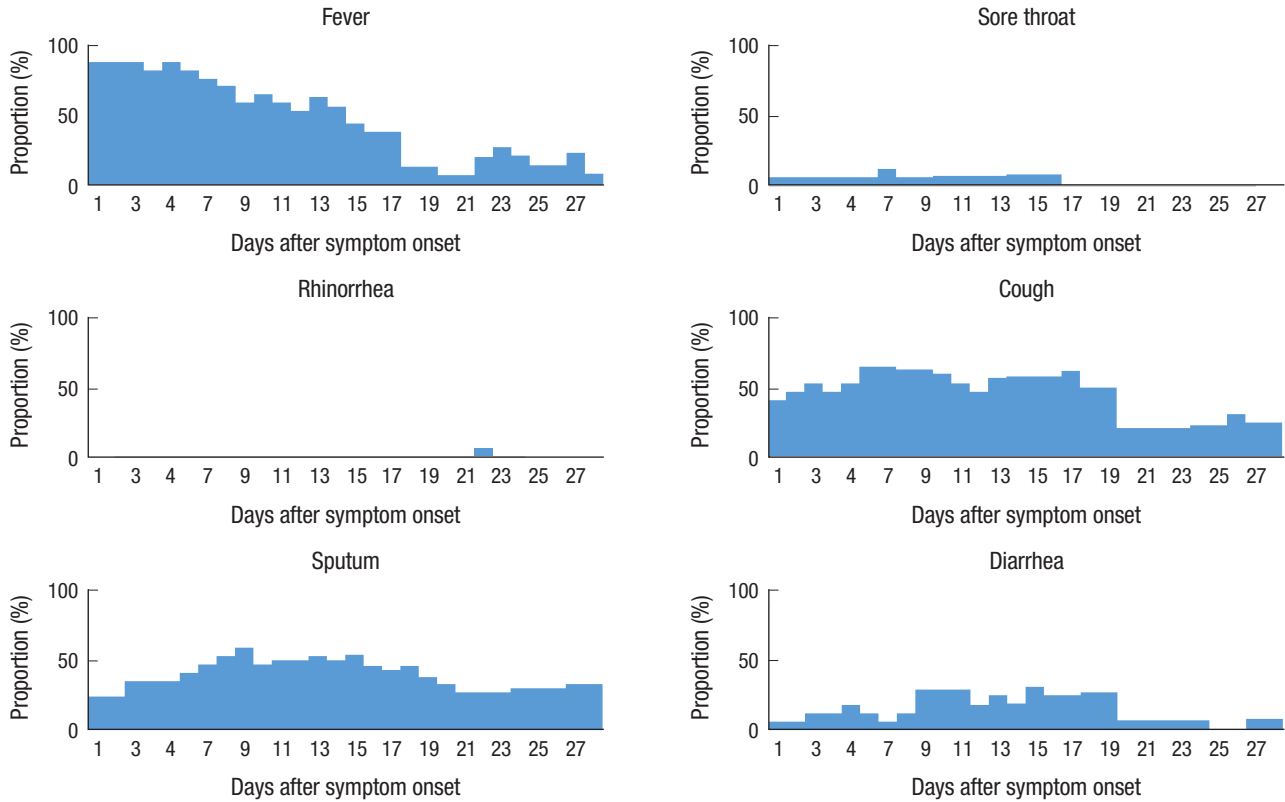

**Supplementary Fig. 1.** Clinical symptoms over the course of MERS-CoV infection. Shown are the changes in clinical symptoms (fever, sore throat, rhinorrhea, cough, sputum, and diarrhea) during the course of diseases. Clinical symptoms before admission were assessed retrospectively via interview on admission and clinical symptoms after admission to study hospitals were assessed prospectively until discharge. Upper respiratory symptoms such as rhinorrhea and sore throat were rare during the course of disease.
