# Supplementary material for: Clinical Progression and Cytokine Profiles of Middle East Respiratory Syndrome Coronavirus Infection
Source: PubMed Central journal article supplement — J Korean Med Sci. 2016 Sep 2;31(11):1717–25. doi: 10.3346/jkms.2016.31.11.1717 (PMC5056202; doi:10.3346/jkms.2016.31.11.1717), 2016-09-02
Supplement: jkms-31-1717-s005.pdf [file jkms-31-1717-s005.pdf]

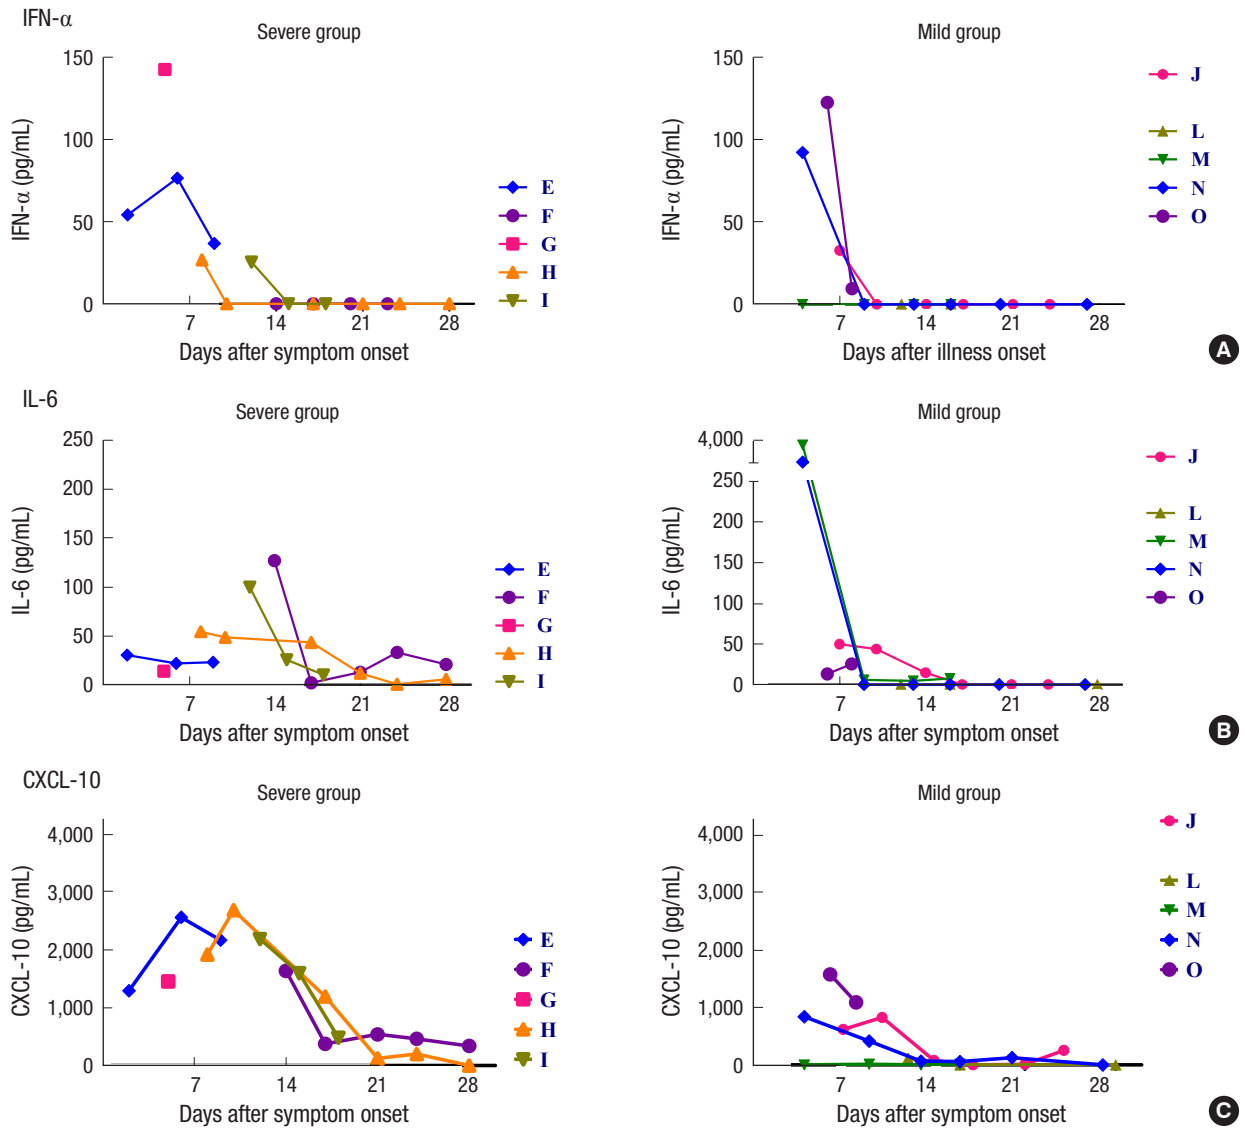

**Supplementary Fig. 3.** Changes of the serum levels of cytokine and chemokine over time after symptom onset in the patient with MERS-CoV infection, excluding the measurement values after administration of pegylated interferon alpha-2a.
